# Supplementary material
Source: PubMed Central journal article supplement (PMC6210227)

# Supplemental Figure 2

A

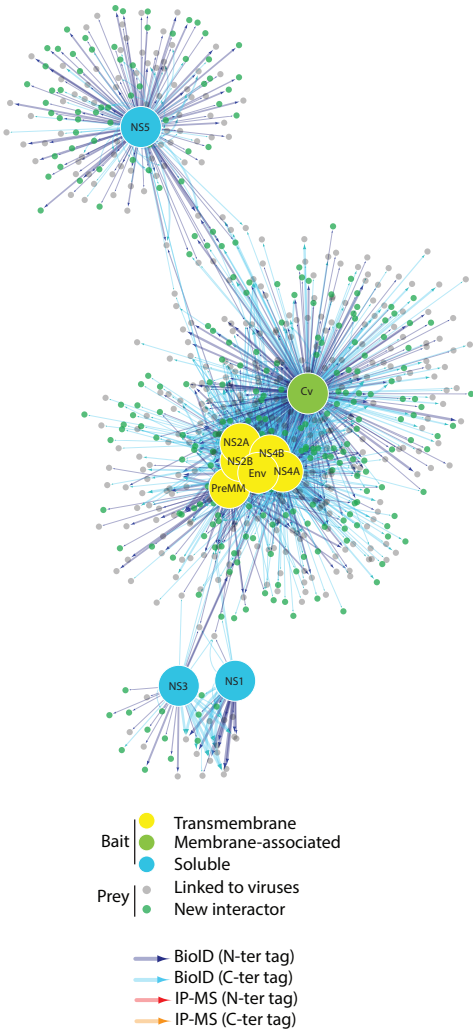

B

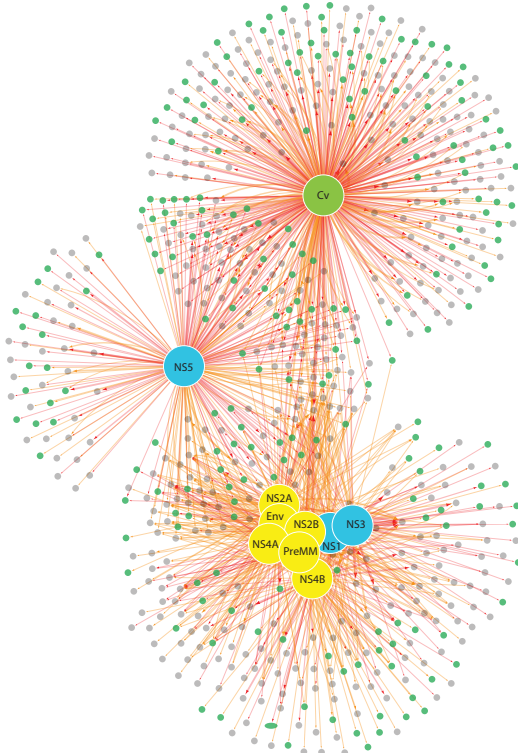

C

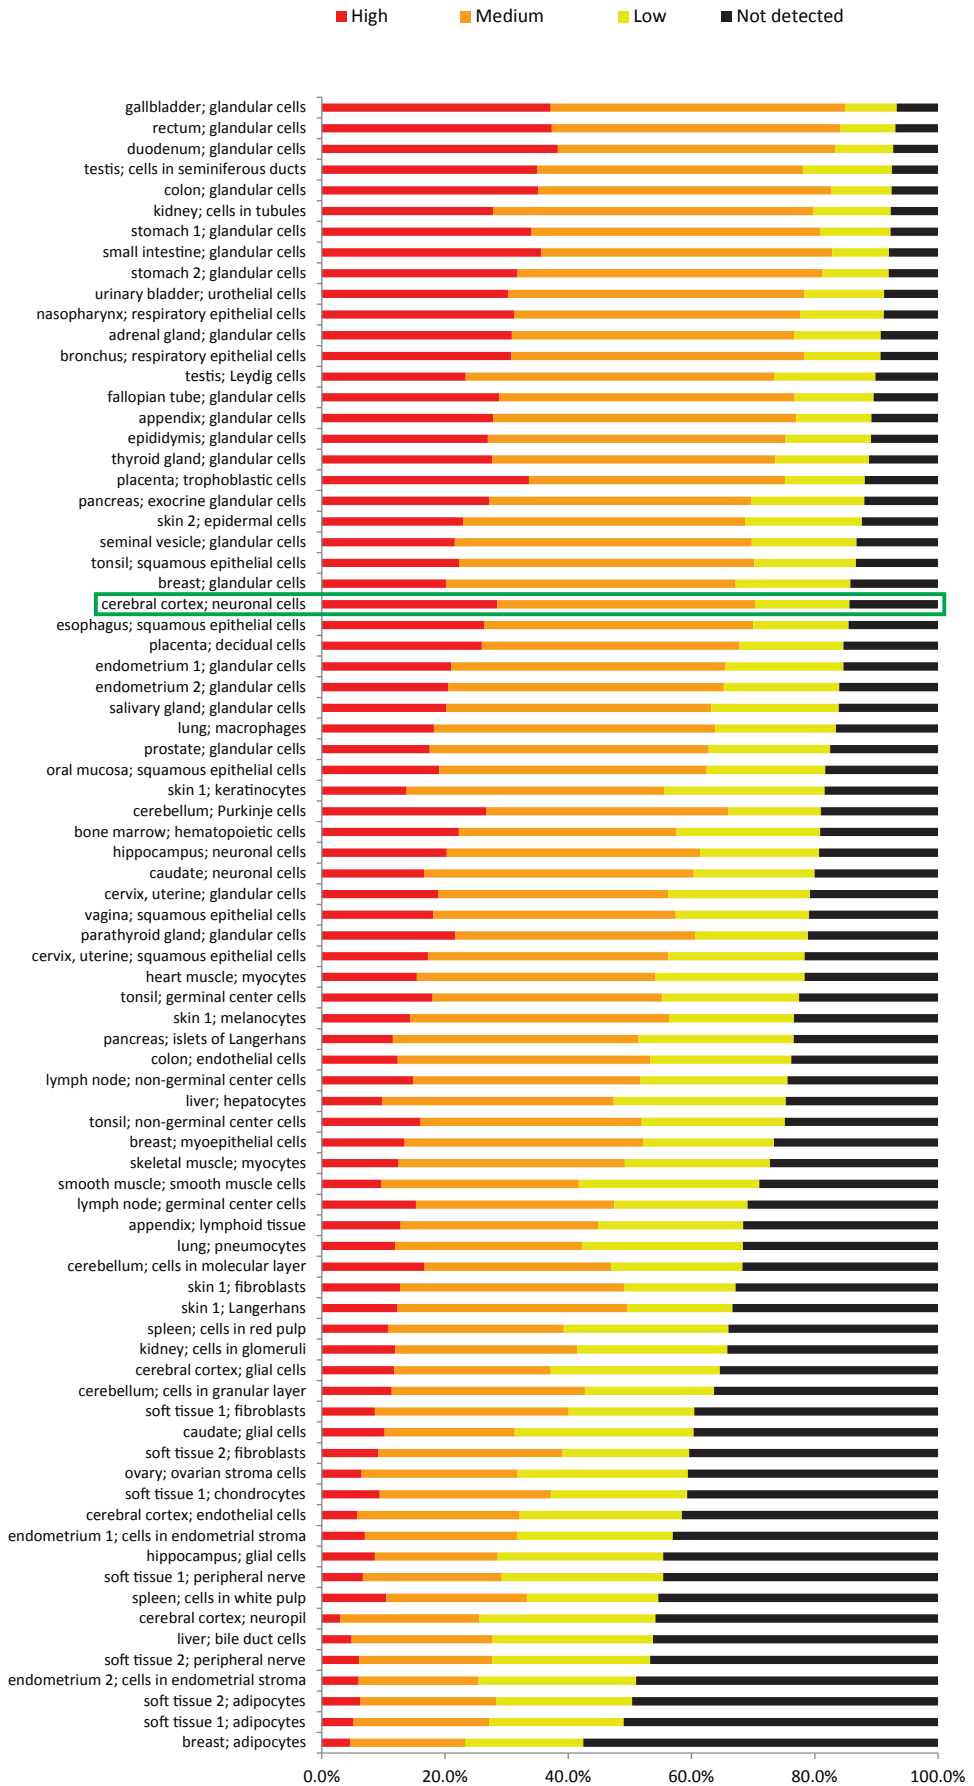

Supplement: 137442_1_supp_164798_pbg7hs.pdf [file 137442_1_supp_164798_pbg7hs.pdf]

# Supplemental Figure 3

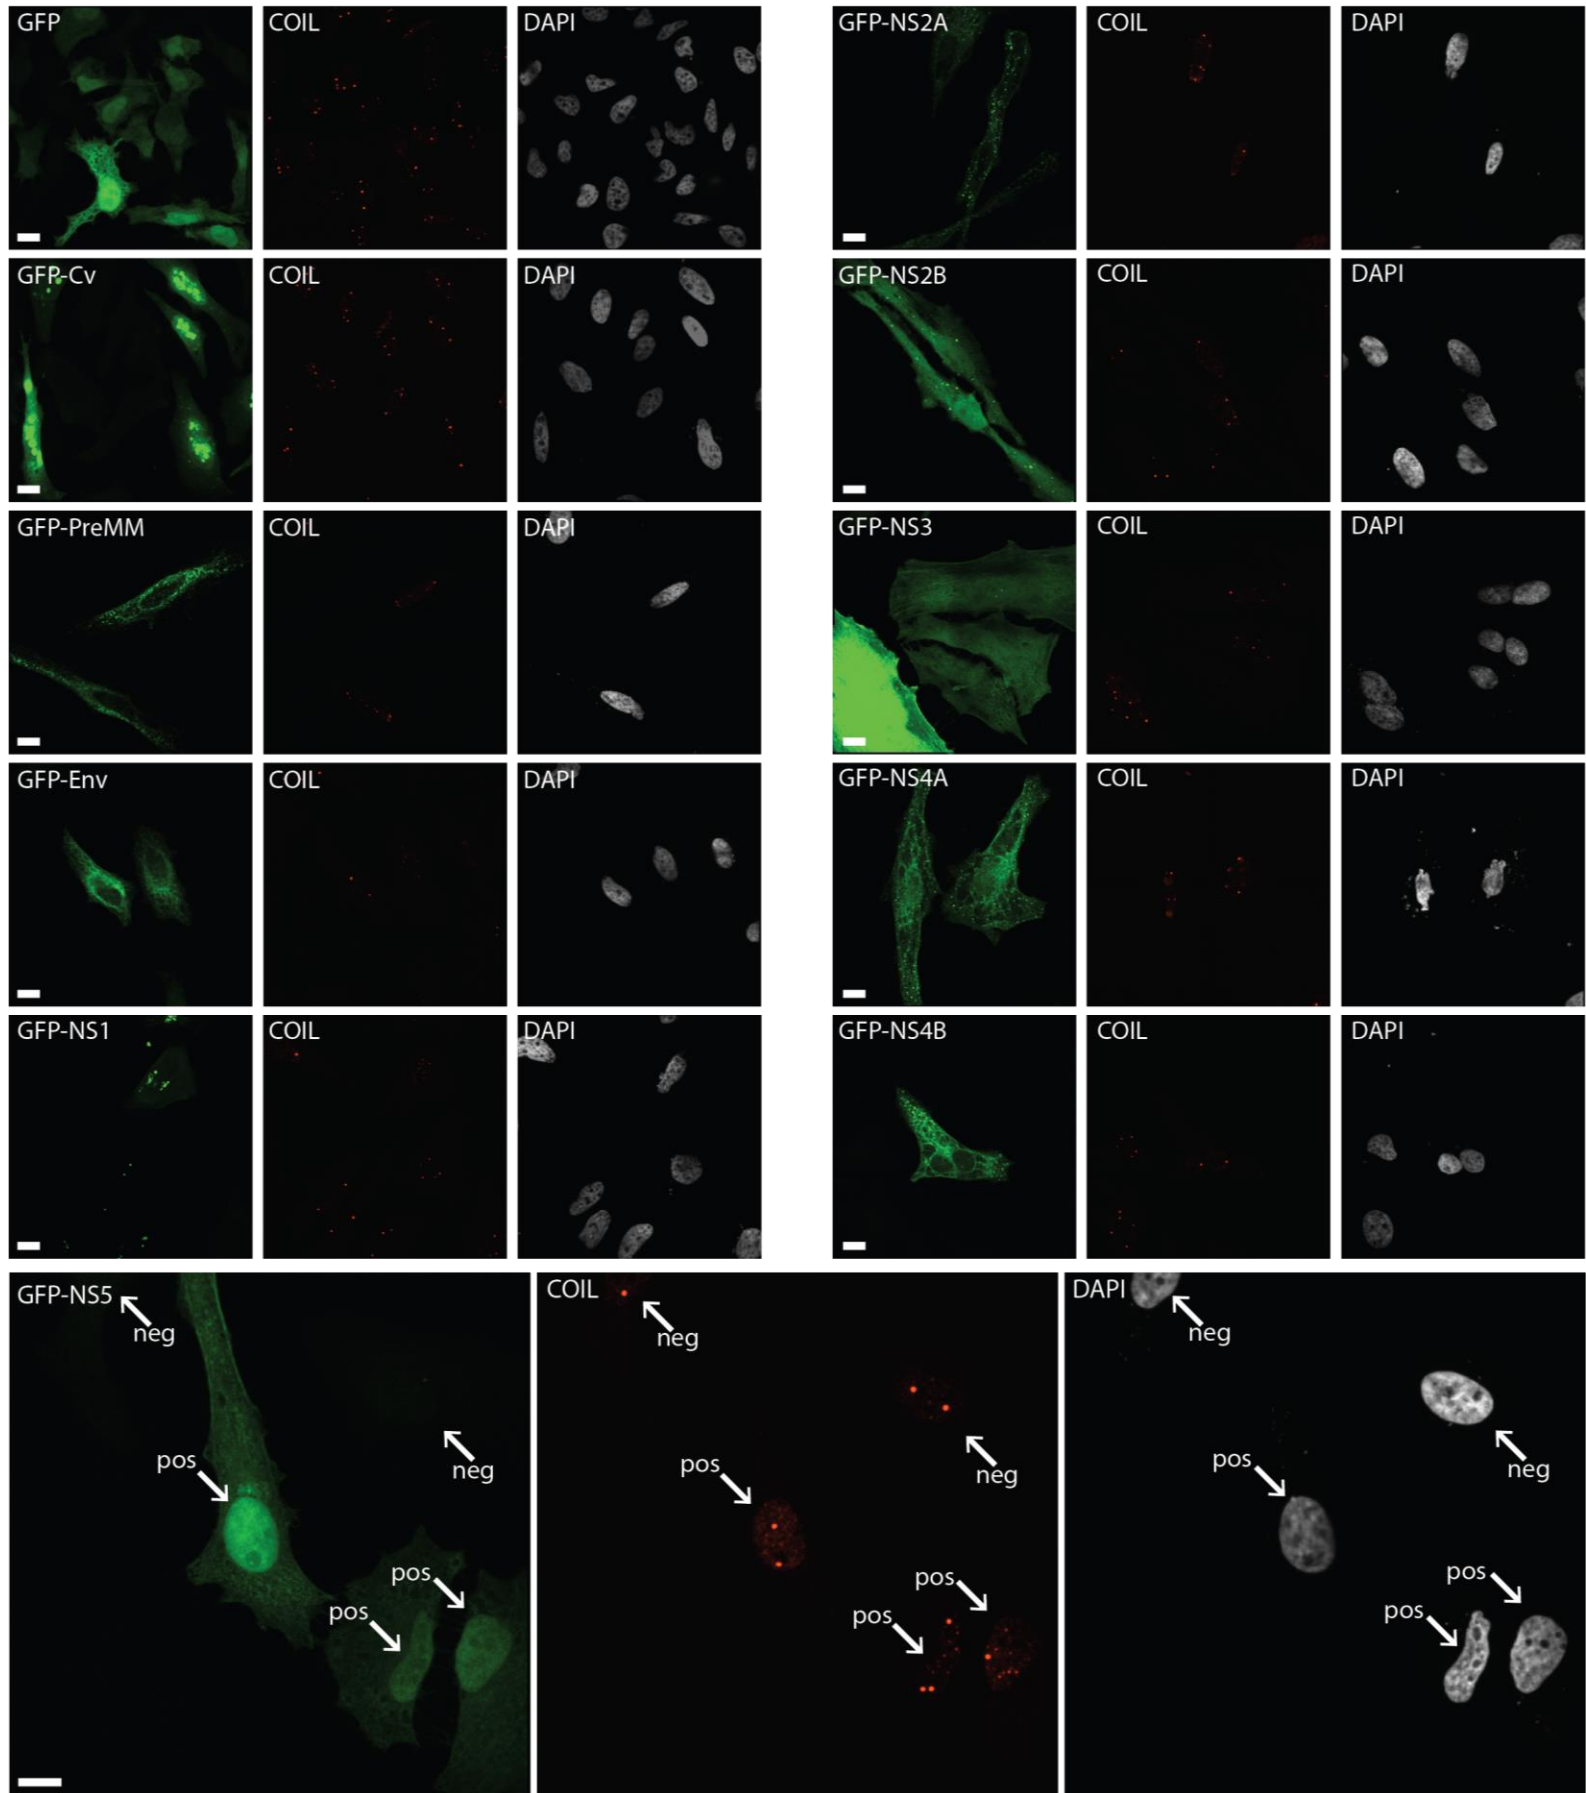

Supplement: 137442_1_supp_164860_pbg9xj.pdf [file 137442_1_supp_164860_pbg9xj.pdf]

# Supplemental Figure 4

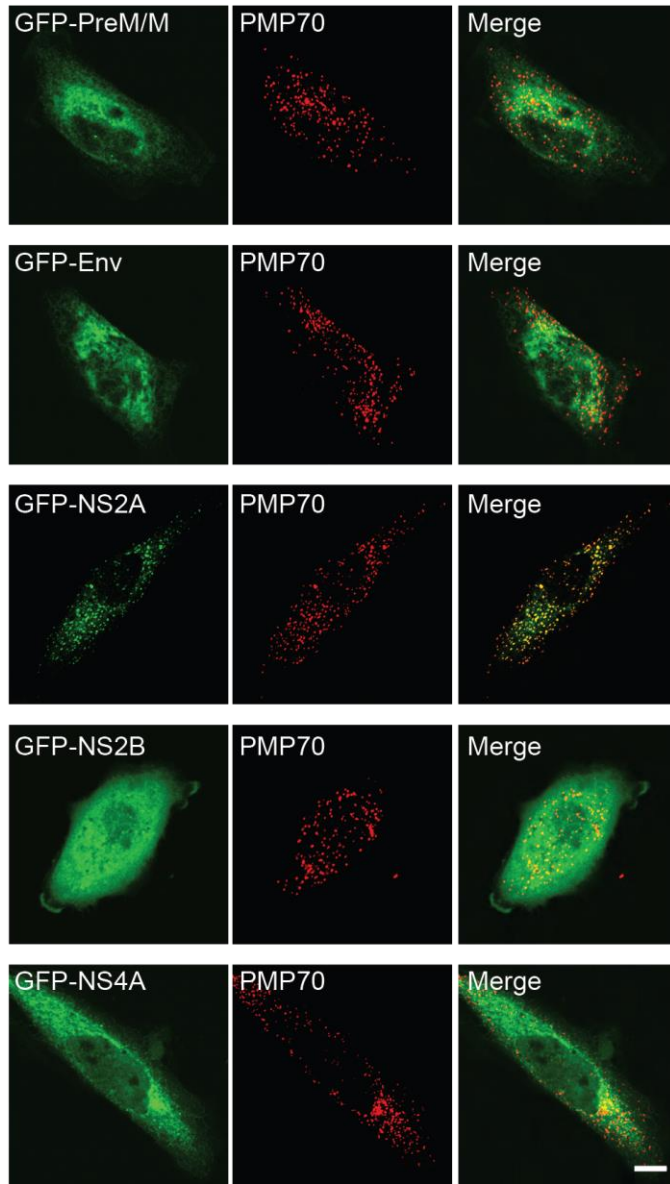

Supplement: 137442_1_supp_164861_pbg9xs.pdf [file 137442_1_supp_164861_pbg9xs.pdf]
